# Supplementary material
Source: MDPI journal article supplement (https://www.mdpi.com/2071-1050/14/2/938)
Supplement: s1 [file s1]

# A bibliographic list of the 75 documents selected for this review study

1. Abdulmuttalib, H. Information extraction and dependency on Open Government Data (OGD) for environmental monitoring. In Proceedings of the 23rd International Archives of the Photogrammetry, Remote Sensing and Spatial Information Sciences Congress, ISPRS 2016, 2016; pp. 79-83.
2. Aguirre, R.; Nyerges, T. An Agent-Based Model of Public Participation in Sustainability Management. *Jasss-J Artif Soc S* **2014**, *17*, 20, doi:10.18564/jasss.2297.
3. Amoroso, N.; Pierre, A.; Olson, L.; Pearsell, G.; Lavigne, D. Geodesign: Applications towards Smarter Planning and Urban Design Solutions. *Journal of Agriculture and Environmental Sciences* **2019**, *8*, doi:10.15640/jaes.v8n2a2.
4. Çabuk, S.N.; Değerliyurt, M.; Metin, T.C.; Çabuk, A. Evaluating geodesign with ecophysiology. In Proceedings of the 41st IAHS World Congress on Housing, Albufeira, Algarve, Portugal, 2016.
5. Campagna, M. Geographic Information and Covid-19 outbreak Does the spatial dimension matter? *Tema* **2020**, 31-44, doi:10.6092/1970-9870/6850.
6. Caperna, A.; Tracada, E.; Minervino, G.; Alatalo, E.; Cerreta, M. Spatial and economic smart strategies for the 21st-century metropolitan city of Naples. *Advances in 21st Century Human Settlements* **2019**, 665-755, doi:10.1007/978-981-10-8588-8\_12.
7. Cerreta, M.; De Toro, P.; Inglese, P.; Iodice, S. Operationalizing circular economy: adaptive assessments for wastescape regeneration In Proceedings of the International Conference for the 75th Anniversary of DTL, Pécs, Hungary, 19-20 April, 2018.
8. Cerreta, M.; Inglese, P.; Manzi, M.L. Shared Values in Practice: a Multi-Methodological Approach for River Landscapes. In Proceedings of the UNISCAPE En-Route International Seminar: Recovering River Landscapes, University of Naples 'FEDERICO II', 28-30/09/2015, 2016.
9. Chen, S.; Lee, V. The Spatial Planning of Australia's Energy Land-scape: An Assessment of Solar, Wind and Biomass Potential at the National Level. *Journal of Digital Landscape Architecture* **2016**, *1*, 169-178.
10. Crumley, C.L.; Kolen, J.C.A.; de Kleijn, M.; van Manen, N. Studying long-term changes in cultural landscapes: outlines of a research framework and protocol. *Landscape Res* **2017**, *42*, 880-890, doi:10.1080/01426397.2017.1386292.
11. Datta, U.S. Developing a Biophilic City through Natural Land Transformation Analysis and Geodesign: The case of Purbachal New Town, Bangladesh. Davis College of Agriculture, Natural Resources and Design, West Virginia University, West Virginia, 2020.
12. Davis, J.M. Evaluation of Geodesign as a Planning Framework for American Indian Communities in the Southwest United States. Arizona State University, Arizona, 2020.
13. De Araújo, R.P.Z.; Moura, A.C.M.; Nogueira, T.D.A. Creating collaborative environments for the development of slum upgrading and illegal settlement regularization plans in Brazil: The maria tereza neighborhood case in belo horizonte. *Intl. J. E Plan. Res.* **2018**, *7*, 25-43, doi:10.4018/IJEPR.2018100102.
14. Dias, E.; Linde, M.; Scholten, H.J. Geodesign: Integrating geographical sciences and creative design in envisioning a 'New Urban Europe'. *Int. J. Global Environ. Iss.* **2015**, *14*, 164-174, doi:10.1504/IJGENVI.2015.067488.
15. Eikelboom, T.; Janssen, R. Collaborative use of geodesign tools to support decision-making on adaptation to climate change. *Mitig Adapt Strat Gl* **2017**, *22*, 247-266, doi:10.1007/s11027-015-9633-4.
16. Foster, K. Geodesign. In *International Encyclopedia of Human Geography*; Elsevier: 2020; pp. 7-17.
17. Fraley, G.W. Including natural hazard risk analysis in an optimization model for evacuation planning: A spatial multi-objective memetic algorithm. **2011**. Available online: [www.tortenmeer.de/images/All-Papers/MP-2010/Grant.pdf](http://www.tortenmeer.de/images/All-Papers/MP-2010/Grant.pdf) (accessed on 30 June 2020).
18. Gottwald, S.; Janssen, R.; Raymond, C. Can Geodesign Be Used to Facilitate Boundary Management for Planning and Implementation of Nature-based Solutions? In *Modelling Nature-based Solutions*; Cambridge University Press: 2020; pp. 305-340.
19. Gu, Y.; Deal, B. Geodesign, resilience and planning support systems: the integration of process and technology. In *Handbook of Planning Support Science*, Geertman, S., Stillwell, J., Eds.; Edward Elgar Publishing: Cheltenham, United Kingdom, 2020; pp. 110-131.
20. Gu, Y.; Deal, B.; Larsen, L. Geodesign processes and ecological systems thinking in a coupled human-environment context: An integrated framework for landscape architecture. *Sustainability* **2018**, *10*, doi:10.3390/su10093306.
21. Gu, Y.; Deal, B.; Orland, B.; Campagna, M. Evaluating practical implementation of geodesign and its impacts on resilience. *Journal of Digital Landscape Architecture* **2020**, 2020, 467-475, doi:10.14627/537690048.

22. Hampshire, A.; Sipes, J.L. From disaster to sustainability: breaking the cycle of floods in Houston. *Aims Geosci* **2019**, *5*, 899-920, doi:10.3934/geosci.2019.4.899.
23. Herron, M.; Jones, D.; Roos, P.; Donley, C. Geodesign and Simulation of Two Australian Communities 2016–2050: What Does the Future Hold Are They Sustainable or Not? In Proceedings of the Proceedings of the International conference “InterCarto/InterGIS”, //, 2015; pp. 504-513.
24. Hong, M.; Li, D.; Yuan, H.; You, H. Land Use Strategy Planning in Beijing Suburban Hilly Area Based on GeoDesign. *Chinese Landscape Architecture* **2014**.
25. Hu, H.; Lin, T.; Wang, S.; Rodriguez, L.F. A cyberGIS approach to uncertainty and sensitivity analysis in biomass supply chain optimization. *Appl Energ* **2017**, *203*, 26-40, doi:10.1016/j.apenergy.2017.03.107.
26. Janssen, R. Using geodesign to support land use management of fen meadow areas in Friesland. In Proceedings of the IALE 2017 European Landscape Ecology Congress: From pattern and process to people and action, Ghent, 12-15/09/2017, 2017.
27. Janssen, R.; Eikelboom, T.; Verhoeven, J.; Brouns, K. Using Geodesign to Develop a Spatial Adaptation Strategy for Friesland. In *Geodesign by Integrating Design and Geospatial Sciences*; GeoJournal Library; Springer International Publishing: 2014; pp. 103-116.
28. Jenkins, J.L. Navigating campus: a geospatial approach to 3-D routing. Kansas State University, Manhattan, 2013.
29. Jia, L.; Ma, Q.; Du, C.; Hu, G.; Shang, C. Rapid urbanization in a mountainous landscape: patterns, drivers, and planning implications. *Landsc. Ecol.* **2020**, doi:10.1007/s10980-020-01056-y.
30. Ju, Y.; Radke, J. Mapping Sea Level Rise and Storm Inundation by 3DI Hydrodynamic Model in the San Francisco Bay Area and Its Implications for Future Planning and Design. In Proceedings of the CELA conference (Paper No. 14-4), Baltimore, 2014.
31. Kazak, J.K.; Castro, D.G.; Swiader, M.; Szezwanski, S. Decision Support System in Public Transport Planning for Promoting Urban Adaptation to Climate Change. In Proceedings of the 3rd World Multidisciplinary Civil Engineering, Architecture, Urban Planning Symposium, WMCAUS 2018, Prague; Czech Republic, 2019.
32. Kim, M. Teaching Coastal Resilience Using Geodesign: A Study of Virginia Beach. *Journal of Digital Landscape Architecture* **2017**, *2*, 279-286, doi:10.14627/537629029.
33. Koomen, E.; Rijken, B.C. Recent Applications of a Land-use Change Model in Support of Sustainable Urban Development. In *Geodesign by Integrating Design and Geospatial Sciences*; GeoJournal Library; Springer International Publishing: 2014; pp. 87-102.
34. Lee, D.J.; Dias, E.; Scholten, H.J. Introduction to Geodesign Developments in Europe. In *Geodesign by Integrating Design and Geospatial Sciences*; GeoJournal Library; Springer International Publishing: 2014; pp. 3-9.
35. Liao, C.; Qiu, J.; Chen, B.; Chen, D.; Fu, B.; Georgescu, M.; He, C.; Jenerette, G.D.; Li, X.; Li, X.; et al. Advancing landscape sustainability science: theoretical foundation and synergies with innovations in methodology, design, and application. *Landsc. Ecol.* **2020**, *35*, doi:10.1007/s10980-020-00967-0.
36. Liu, Z.; He, C.; Yang, Y.; Fang, Z. Planning sustainable urban landscape under the stress of climate change in the drylands of northern China: A scenario analysis based on LUSD-urban model. *J Clean Prod* **2020**, *244*, doi:10.1016/j.jclepro.2019.118709.
37. Maidment, D.R. HydroDesign and the Digital Campus. **2013**. Available online: <http://caee.utexas.edu/prof/maidment/CE365KSpr14/Docs/HydroDesign.pdf> (accessed on 24 April 2020).
38. Minner, J. Geodesign, resilience and the future of former mega-event sites. *15th International Conference on Computers in Urban Planning and Urban Management, 2017* **2017**, 135-152, doi:10.1007/978-3-319-57819-4\_8.
39. Moura, A.C.M.; de Oliveira, F.H.; Furlanetti, T.; Panceli, R.; de Oliveira, E.F.P.; Steinitz, C. Geodesign as Co-creation of Ideas to Face Challenges in Indigenous Land in the South of Brazil: Case Study Ibirama La Klano. In *Computational Science and Its Applications – ICCSA 2020*; Lecture Notes in Computer Science; Springer International Publishing: 2020; pp. 279-295.
40. Newman, G.; Kim, Y.; Joshi, K.; Liu, J. Integrating prediction and performance models into scenario-based resilient community design. *Journal of Digital Landscape Architecture* **2020**, *2020*, 510-520, doi:10.14627/537690052.
41. Newman, G.; Malecha, M.; Yu, S.; Qiao, Z.; Horney, J.A.; Lee, J.; Kim, Y.J.; Lee, R.J.; Berke, P. Integrating a resilience scorecard and landscape performance tools into a Geodesign process. *Landscape Res* **2020**, *45*, 63-80, doi:10.1080/01426397.2019.1569219.
42. Nhan, N.H.; Haruyama, S. The visible impacts of human activities constructing hydropower dam on Vietnamese Mekong Delta and conceptual solutions for responses. *Abstr. Int. Cartogr. Assoc.* **2019**, *1*, 270, doi:10.5194/ica-abs-1-270-2019.

43. Orland, B. Geodesign to Tame Wicked Problems. *Journal of Digital Landscape Architecture* **2016**, 1, 187-197, doi:10.14627/537612022.
44. Osman, A. Flood risk assessment and reduction in the Ankobra estuary of the Western Region of Ghana. University of Cape Coast, Cape Coast, Ghana, 2015.
45. Osman, A.; Nyarko, B. Geodesign a Tool for Redefining Flood Risk Disaster in Developing Countries: A Case Study of Southern Catchment of Ankobra Basin, Ghana. In *Flood Risk Management*; InTech: 2017.
46. Peddemors, Y.; Willemse, B. Case study: Flood impact reduction. In Proceedings of the 9th International Conference on Computer Simulation in Risk Analysis and Hazard Mitigation, RISK 2014, New Forerst, 2014; pp. 441-449.
47. Pembleton, C. Applied Use of Geodesign to Enhance Urban Climate Change Resilience Decision Making. In Proceedings of the 2016 Geodesign Summit, Redlands, CA, 2016.
48. Pettit, C.; Wentz, E.; Randolph, B.; Sanderson, D. Tackling the challenge of growing cities: An informed urbanisation approach. In *Open Cities | Open Data*, Hawken, S., Han, H., Pettit, C., Eds.; Palgrave Macmillan, Singapore: Singapore, 2020; pp. 197-219.
49. Pierre, A. Using Geodesign to Communicate the Effects of Bioswales on Urban Stormwater Management. atrium.lib.uoguelph.ca, 2017.
50. Pierre, A.; Amoroso, N.; Kelly, S. Geodesign application for bio-swale design: rule-based approach stormwater management for Ottawa Street North in Hamilton, Ontario. *Landscape Res* **2019**, 44, 642-658, doi:10.1080/01426397.2018.1498071.
51. Plag, H.P. A Geospace for SDGs: Engaging the People through Data Integration in the Implementing the 2030 Agenda for Sustainable Development. *AGU Fall Meeting Abstracts* **2018**.
52. Quan, S.J. Smart design for sustainable neighborhood development. In Proceedings of the 10th International Conference on Applied Energy, ICAE 2018, 2019; pp. 6515-6520.
53. Rani, M.; Lange, E.; Cameron, R. Future development scenarios for adaptation to climate change in the Ci Kapundung upper water catchment area, Bandung Basin, Indonesia. *Journal of Digital Landscape Architecture* **2018**, 3, 23-33, doi:10.14627/537642003.
54. Remøy, H.; Wandl, A.; Ceric, D.; van Timmeren, A. Facilitating circular economy in urban planning. *Urban Planning* **2019**, 4, 1-4, doi:10.17645/up.v4i3.2484.
55. Reynolds, J.A. A Geodesign Inspired Multiple Criteria Decision Tool for Prioritizing Levee Setback Project Sites. digital.lib.washington.edu, 2014.
56. Reynolds, K.M.; Murphy, P.J.; Paplanus, S. Toward geodesign for watershed restoration on the Fremont-Winema national forest, Pacific Northwest, USA. *Sustainability* **2017**, 9, doi:10.3390/su9050678.
57. Ribas, R.P.; Gontijo, B.M.; Moura, A.C.M. Geodesign for landscape connectivity planning. *Cartography - Maps Connecting the World* **2015**, 333-346, doi:10.1007/978-3-319-17738-0\_23.
58. Rivero, R.; Smith, A.L.; Ballal, H.; Steinitz, C.; Orland, B.; McClenning, L.; Calabria, J.; Perkl, R.; Key, H. Experiences in geodesign in Georgia, USA. *Disegnare con* **2018**, 11, 14.11-14.14.
59. Ruddell, D.; Foster, K. GIS&T and Geodesign. *Geographic Information Science & Technology Body of Knowledge* **2018**, 2018, doi:10.22224/gistbok/2018.3.3.
60. Schroth, O.; Wang, P.; Ballal, H. Geodesigning Climate Change Adaptation on a Regional Level through Shelterbelt Provision in the Jingjinji Area. *Journal of Digital Landscape Architecture* **2017**, 2, 125-135, doi:doi:10.14627/537629013.
61. Shahpari, S. Agricultural land use planning: exploring the potential of spatial agent-based modelling (ABM). University of Tasmania, Hobart, 2019.
62. Sophronides, P. Decision Support Systems for Participatory Flood Risk and Disaster Management. National Technical University of Athens, Athens, 2016.
63. Sophronides, P.; Steenbruggen, J.; Scholten, H.J.; Giaoutzi, M. Geodesign the multilayered water safety. *Research in Urbanism Series* **2016**, 4, 113-138, doi:10.7480/rius.4.825.
64. Su, P.H. A Conceptual Framework of Communication System of Design for Empowering Post-disaster Communities. *New Trends on System Sciences and Engineering* **2015**, 276, 241-249, doi:10.3233/978-1-61499-522-7-241.
65. ten Voorde, J. Relocating Rotterdam: The task of spatial planning and urban design throughout scales in the context of extreme flood risk scenarios in the Netherlands. Delft University of Technology, Delft, 2018.
66. Tran, D.X.; Pearson, D.; Palmer, A.; Gray, D. Developing a landscape design approach for the sustainable land management of hill country farms in New Zealand. *Land* **2020**, 9, doi:10.3390/LAND9060185.
67. van Asselen, S.; Scholten, H.J.; Koshiek, L. Geodesign to Support Multi-level Safety Policy for Flood Management. In *Geodesign by Integrating Design and Geospatial Sciences*; GeoJournal Library; Springer International Publishing: 2014; pp. 117-132.

68. Vera, M. The Corridor Island: A New Space to Redesign the Landscape of Tenerife. In *Urban Agglomeration*, Ergen, M., Ed.; IntechOpen Limited: London, 2017.
69. Weller, R. Stewardship now?: Reflections on landscape architecture's raison d'être in the 21st century. *Landsc J* **2014**, *33*, 85-108, doi:10.3368/lj.33.2.85.
70. Wu, C.L.; Chiang, Y.C. A geodesign framework procedure for developing flood resilient city. *Habitat Int* **2018**, *75*, 78-89, doi:10.1016/j.habitatint.2018.04.009.
71. Yang, P.P.-J. Energy Resilient Urban Planning. In *Geodesign by Integrating Design and Geospatial Sciences*; GeoJournal Library; Springer International Publishing: 2014; pp. 43-54.
72. Yang, P.P.J.; Chang, S.; Saha, N.; Chen, H.W. Data-driven planning support system for a campus design. *Environ Plan B-Urban* **2020**, *16*, doi:10.1177/2399808320910164.
73. Yang, P.P.J.; Chi, C.S.F.; Wu, Y.; Quan, S.J. A Geodesign Method of Human-Energy-Water Interactive Systems for Urban Infrastructure Design: 10KM2 Near-Zero District Project in Shanghai. *Engineering-Pro* **2018**, *4*, 182-189, doi:10.1016/j.eng.2018.03.014.
74. Zandvoort, M.; van der Vlist, M.J. The Multi-Layer Safety Approach and Geodesign: Exploring Exposure and Vulnerability to Flooding. In *Geodesign by Integrating Design and Geospatial Sciences*; GeoJournal Library; Springer International Publishing: 2014; pp. 133-148.
75. Zuidema, S.; Cronan, D.; Trammell, E.J.; Lammers, R.B. Plausible 21st century water management through stakeholder-driven modeling of a water-stressed, agricultural socio-economic system in the American West. In *Proceedings of the AGU Fall Meeting Abstracts*, //, 2019.
